# Supplementary material
Source: publisher site journal article supplement (https://www.dovepress.com/article/381368)
Supplement: Supplementary file 1 [file get_supplementary_file.php]

**Supplemental Table 1** Local Visual Field Change Over Time in dB

| Region |  |  | Baseline Mean (SD)  (N = 44) |  | Follow up Mean (SD)  (N = 32) | P-Valuea |
| --- | --- | --- | --- | --- | --- | --- |
| TD superior central  TD superior paracentral TD superior nasal  TD superior arcuate 1  TD superior arcuate 2  TD inferior central  TD inferior paracentral TD inferior nasal  TD inferior arcuate 1  TD inferior arcuate 2  PD superior central  PD superior paracentral PD superior nasal  PD superior arcuate 1  PD superior arcuate 2  PD inferior central  PD inferior paracentral PD inferior nasal  PD inferior arcuate 1  PD inferior arcuate 2  TDP superior central  TDP superior paracentral TDP superior nasal  TDP superior arcuate 1 TDP superior arcuate 2 TDP inferior central  TDP inferior paracentral TDP inferior nasal  TDP inferior arcuate 1 TDP inferior arcuate 2 PDP superior central PDP superior paracentral PDP superior nasal  PDP superior arcuate 1 PDP superior arcuate 2 PDP inferior central  PDP inferior paracentral PDP inferior nasal  PDP inferior arcuate 1 PDP inferior arcuate 2 | |  | -8.7 (8.6)  -9.6 (9.4)  -10.3 (10.3)  -8.6 (9.0)  -6.6 (7.3)  -7.7 (8.6)  -9.5 (10.3)  -10.4 (10.1)  -8.6 (8.8)  -7.6 (8.4)  -5.7 (6.9)b  -6.6 (7.2)b  -7.5 (8.6)b  -6.1 (7.1)b  -4.3 (5.6)b  -5.0 (7.4)  -6.3 (8.2)b  -7.4 (7.9)b  -5.6 (6.5)b  -4.7 (6.8)b  2.3 (1.6)  2.4 (1.6)  2.1 (1.7)  1.8 (1.6)  1.4 (1.5)  2.1 (1.6)  2.4 (1.6)  2.2 (1.6)  2.1 (1.6)  1.8 (1.5)  1.1 (1.4)  1.3 (1.5)  1.3 (1.6)  1.1 (1.5)  0.6 (1.2)  1.0 (1.4)  1.2 (1.4)  1.3 (1.6)  1.1 (1.4)  0.8 (1.3) |  | -7.3 (8.1)  -9.0 (9.8)  -10.0 (10.9)  -8.1 (9.1)  -7.2 (7.8)  -6.5 (10.0)  -9.1 (11.4)  -8.8 (10.0)  -8.2 (9.8)  -6.3 (8.6)  -6.1 (7.2)  -7.6 (8.4)  -8.7 (9.5)  -7.2 (8.0)  -5.9 (6.2)  -5.2 (9.0)  -7.8 (10.0)  -7.5 (8.3)  -6.9 (8.1)  -4.9 (7.0)  1.8 (1.7)  2.0 (1.7)  1.9 (1.8)  1.7 (1.7)  1.5 (1.6)  1.4 (1.6)  2.1 (1.6)  1.7 (1.6)  1.9 (1.6)  1.4 (1.5)  1.1 (1.4)  1.4 (1.7)  1.4 (1.7)  1.3 (1.6)  1.0 (1.4)  0.8 (1.5)  1.5 (1.6)  1.2 (1.6)  1.3 (1.6)  0.9 (1.4) | 0.18  0.56  0.75  0.65  0.51  0.16  0.70  0.13  0.68  0.18  0.67  0.27  0.31  0.16  0.03  0.87  0.14  0.94  0.16  0.82  0.02  0.07  0.41  0.49  0.72  0.008  0.14  0.03  0.31  0.07  0.91  0.44  0.79  0.12  0.02  0.45  0.16  0.53  0.13  0.45 |

**Abbreviation**: dB = decibel; N = number; SD = standard deviation; PD = pattern deviation; PDP = pattern deviation probability; TD = total deviation; TDP = total deviation probability.

**Notes**: a Generalized linear model with generalized estimating equation (GEE) method was used for comparison of difference between baseline and follow up. b N = 42 instead of N = 44.
